# Supplementary material
Source: ML conference proceedings conference paper supplement (https://aclanthology.org/2020.spnlp-1.7)
Supplement: OptionalSupplementaryMaterial [file 2020.spnlp-1.7.OptionalSupplementaryMaterial.zip]

Archive with 2 entries (1 files):
- Supplementary/
- Supplementary/BERT_StructuredLMTC_Supp(1).pdf
